# Supplementary material
Source: publisher site journal article supplement (https://studysites.sagepub.com/foundations/includes/Appendix%20A.Ivankova,%20et%20al.2006.pdf)

Using Mixed-Methods  
Sequential Explanatory Design:  
From Theory to Practice

NATALIYA V. IVANKOVA

University of Alabama at Birmingham

JOHN W. CRESWELL

SHELDON L. STICK

University of Nebraska-Lincoln

*This article discusses some procedural issues related to the mixed-methods sequential explanatory design, which implies collecting and analyzing quantitative and then qualitative data in two consecutive phases within one study. Such issues include deciding on the priority or weight given to the quantitative and qualitative data collection and analysis in the study, the sequence of the data collection and analysis, and the stage/stages in the research process at which the quantitative and qualitative data are connected and the results are integrated. The article provides a methodological overview of priority, implementation, and mixing in the sequential explanatory design and offers some practical guidance in addressing those issues. It also outlines the steps for graphically representing the procedures in a mixed-methods study. A mixed-methods*

**Comment [CT1]:** This describes the type of MM design that the study employs.

**Comment [CT2]:** Both QUAN and QUAL data are gathered and analyzed in this study.

**Comment [CT3]:** This MM study involves the integration of both QUAN and QUAL results.

*sequential explanatory study of doctoral students' persistence in a distance-learning program in educational leadership is used to illustrate the methodological discussion.*

Keywords: mixed methods; quantitative; qualitative; design; survey; case study

**Comment [CT4]:** The survey is a QUAN research design, while the case study is often classified as a QUAL research design.

In recent years, more social and health sciences researchers have been using mixed-methods designs for their studies. By definition, mixed methods is a procedure for collecting, analyzing, and “mixing” or integrating both quantitative and qualitative data at some stage of the research process within a single study for the purpose of gaining a better understanding of the research problem (Tashakkori and Teddlie 2003; Creswell 2005). The rationale for mixing both kinds of data within this one study is grounded in the fact that neither quantitative nor qualitative methods are sufficient, by themselves, to capture the trends and details of a situation. When used in combination, quantitative and qualitative methods complement each other and allow for a more robust analysis, taking advantage of the strengths of each (Green, Caracelli, and Graham 1989; Miles and Huberman 1994; Green and Caracelli 1997; Tashakkori and Teddlie 1998).

**Comment [CT5]:** This is the definition of MM research.

**Comment [CT6]:** This is a reason for using MM in a study

There are about forty mixed-methods research designs reported in the literature (Tashakkori and Teddlie 2003). Creswell et al. (2003) identified the six most often used designs, which include three concurrent and three sequential designs. One of those designs, the mixed-methods sequential explanatory design, is highly popular among researchers and implies collecting and analyzing first quantitative and then qualitative data in two consecutive phases within one study. Its characteristics are well described in the literature (Tashakkori and Teddlie 1998; Creswell 2003, 2005; Creswell et al. 2003),

**Comment [CT7]:** This is the definition of the MM design used in this study: the MM sequential explanatory design.

and the design has found application in both social and behavioral sciences research (Kinnick and Kempner 1988; Ceci 1991; Klassen and Burnaby 1993; Janz et al. 1996).

Despite its popularity and straightforwardness, this mixed-methods design is not easy to implement. Researchers who choose to conduct a mixed methods sequential explanatory study have to consider certain methodological issues. Such issues include the priority or weight given to the quantitative and qualitative data collection and analysis in the study, the sequence of the data collection and analysis, and the stage/stages in the research process at which the quantitative and qualitative phases are connected and the results are integrated (Morgan 1998; Creswell et al. 2003). Although these issues have been discussed in the methodology literature and the procedural steps for conducting a mixed-methods sequential explanatory study have been outlined (Creswell 2003, 2005), some methodological aspects of this design procedure still require clarification. For example, how researchers decide on which method to assign priority in this design, how to consider implementation issues, how and when to connect the quantitative and qualitative phases during the research process, and how to integrate the results of both phases of the study to answer the research questions.

**Comment [CT8]:** MM designs can be difficult to conduct. These are some of the issues in implementing MM designs.

Providing some practical guidelines in solving those issues might help researchers make the right and prompt decisions when designing and implementing mixed-methods sequential explanatory studies. It might also provide additional insight into the mixed-methods procedures and result in more rigorous and reliable designs. It is also important to help researchers visually represent the mixed-methods procedures for their studies. Such graphical modeling of the study design might lead to better understanding of the

**Comment [CT9]:** Visual representations of MM studies are very important in understanding them and their unique characteristics.

characteristics of the design, including the sequence of the data collection, priority of the method, and the connecting and mixing points of the two forms of data within a study.

The purpose of this article is to provide such practical guidance when addressing methodological issues related to the mixed-methods sequential explanatory design. We use a mixed-methods sequential explanatory study of doctoral students' persistence in the distance-learning program in educational leadership (Ivankova 2004) to illustrate the methodological discussion.

#### MIXED-METHODS SEQUENTIAL EXPLANATORY DESIGN

The mixed-methods sequential explanatory design consists of two distinct phases: quantitative followed by qualitative (Creswell et al. 2003). In this design, a researcher first collects and analyzes the quantitative (numeric) data. The qualitative (text) data are collected and analyzed second in the sequence and help explain, or elaborate on, the quantitative results obtained in the first phase. The second, qualitative, phase builds on the first, quantitative, phase, and the two phases are connected in the intermediate stage in the study. The rationale for this approach is that the quantitative data and their subsequent analysis provide a general understanding of the research problem. The qualitative data and their analysis refine and explain those statistical results by exploring participants' views in more depth (Rossman and Wilson 1985; Tashakkori and Teddlie 1998; Creswell, 2003).

**Comment [CT10]:** This study involved the collection of QUAN data first, followed by QUAL data. This is a sequential design in which one component of the study follows the other.

The strengths and weaknesses of this mixed-methods design have been widely discussed in the literature (Creswell, Goodchild, and Turner 1996; Green and Caracelli

**Comment [CT11]:** This is the rationale for the specific MM design that is employed in this study: the sequential explanatory design.

1997; Creswell 2003, 2005; Moghaddam, Walker, and Harre 2003). Its advantages include straightforwardness and opportunities for the exploration of the quantitative results in more detail. This design can be especially useful when unexpected results arise from a quantitative study (Morse 1991). The limitations of this design are lengthy time and feasibility of resources to collect and analyze both types of data.

**Comment [CT12]:** Each MM design has specific strengths and weaknesses of. These are the strengths and weaknesses of the sequential explanatory design.

## ILLUSTRATIVE STUDY

We conducted this study to understand students' persistence in the Distance Learning Doctoral Program in Educational Leadership in Higher Education (ELHE) offered by the University of Nebraska-Lincoln. The program is delivered to students via the distributed learning software using multiple computer systems and platforms, such as Lotus Notes and Blackboard. It uses the Internet as a connecting link and provides asynchronous and collaborative learning experiences to participants (Stick and Ivankova 2004).

The purpose of this mixed-methods sequential explanatory study was to identify factors contributing to students' persistence in the ELHE program by obtaining quantitative results from a survey of 278 of its current and former students and then following up with four purposefully selected individuals to explore those results in more depth through a qualitative case study analysis.

**Comment [CT13]:** The overall purpose for this illustrative study is to identify and then explore in more detail the factors related to why students persisted (remained enrolled) in an academic program.

In the first, quantitative, phase of the study, the quantitative research questions focused on how selected internal and external variables to the ELHE program (program-related, adviser- and faculty-related, institution-related, and student-related factors as well

**Comment [CT14]:** The QUAN part of the study consists of a survey of 278 students, while the QUAL part of the study consists of case studies of four purposively selected individuals.

as external factors) served as predictors to students' persistence in the program. In the second, qualitative, phase, four case studies from four distinct participant groups explored in depth the results from the statistical tests. In this phase, the research questions addressed seven internal and external factors found to be differently contributing to the function discriminating the four groups: program, online learning environment, faculty, student support services, self-motivation, virtual community, and academic adviser.

**Comment [CT15]:** These are the QUAN research questions.

**Comment [CT16]:** These are the QUAL research questions.

### Quantitative Phase

The goal of the quantitative phase was to identify the potential predictive power of selected variables on the doctoral students' persistence in the ELHE program. We collected the quantitative data via a Web-based cross-sectional survey (McMillan 2000; Creswell 2005), using a self-developed and pilot tested instrument. The core survey items formed five seven-point Likert type scales and reflected the following composite ten variables, representing a range of internal and external to the program factors: online learning environment, program, virtual community, faculty, student support services, academic adviser, family and significant other, employment, finances, and self-motivation. We identified those factors through the analysis of the related literature, three theoretical models of student persistence (Tinto 1975; Bean 1980; Kember 1995), and an earlier qualitative thematic analysis study of seven ELHE active students (Ivankova and Stick 2002). Reliability and validity of the survey scale items were established based on both pilot and principle survey administration, using frequency distributions, internal consistency reliability indexes, interitem correlations, and factor analysis. We used a

**Comment [CT17]:** The QUAN data were collected through a Web-based survey.

**Comment [CT18]:** This section describes the core survey items that represent 10 composite variables used in the QUAN component of the study.

**Comment [CT19]:** QUAN factors were identified through literature review, theory, and previously conducted analyses.

panel of professors teaching in the program to secure the content validity of the survey items.

**Comment [CT20]:** The reliability and validity of the QUAN instruments is very important and is determined by several different numerical analyses in this study. The survey instrument is the only data source for the QUAN component of the study.

Criteria for selecting the participants for the quantitative phase included (1) being in the ELHE program; (2) time period of 1994 to spring 2003; (3) must have done half of coursework online; (4) be either admitted, both active and inactive, graduated, withdrawn, or terminated from the program; (5) for those who just started the program, they must have taken at least one online course in the ELHE program. A total of 278

**Comment [CT21]:** Selection criteria for the QUAN portion of the study are well defined.

students met those criteria. Overall, 207 participants responded to the survey, which constituted a response rate of 74.5%. For analysis purposes, we organized all respondents

**Comment [CT22]:** QUAN selection procedures resulted in a relatively large sample (>200) for that portion of the study.

into four groups based on their status in the program and similarity of academic experiences: (1) students who had completed thirty or fewer credit hours of course work (beginning group; n = 78); (2) students who had completed more than thirty credit hours of course work, including dissertation hours (matriculated group; n = 78); (3) former students who had graduated from the program with the doctorate degree (graduated group; n = 26); and (4) former students who either had withdrawn from the program or had been inactive in the program during the past three terms (spring, fall, summer) prior to the survey administration (withdrawn/inactive group; n = 25).

**Comment [CT23]:** This describes the four strata that were developed to divide the QUAN sample into distinct groups.

We used both univariate and multivariate statistical procedures to analyze the survey data. Cross-tabulation and frequency counts helped analyze the survey

**Comment [CT24]:** Descriptive and inferential statistics were used to analyze the QUAN data.

demographic information and the participants' answers to separate items on each of the five survey scales. We used the discriminant function analysis to identify the predictive power of ten selected factors as related to students' persistence in the ELHE program.

The typical participants were between 36 and 54 years of age, predominantly women, employed full-time, mostly from out of state, and married with children. The descriptive analysis of the survey scale items showed that most of the participants were satisfied with their academic experiences in the program, claiming they received all the needed support from both the institution and external entities.

**Comment [CT25]:** Descriptive analysis of the QUAN survey data depicting the typical participant in the academic program.

Based on the discriminant function analysis, only five variables (program, online learning environment, student support services, faculty, and self-motivation) significantly contributed to the discriminating function as related to the participants' persistence in the ELHE program. From these five variables, program and online learning environment had the highest correlation with the function and made the greatest contribution to discriminating among the four groups. Other variables (virtual community, academic adviser, family and significant other, employment, and finances) made no significant contribution to discriminating among the four participant groups.

**Comment [CT26]:** Inferential statistics indicated that there were only five variables that significantly contributed to participants' persistence in the academic program. These results answered the QUAN research questions.

#### Qualitative Phase

In the second, qualitative, phase, we used a multiple case study approach (Yin 2003) to help explain why certain external and internal factors, tested in the first phase, were significant or not significant predictors of students' persistence in the ELHE program. A case study is an exploration of a bounded system or a case over time through detailed, in-depth data collection involving multiple sources of information and rich in context (Merriam 1998). A multiple case study design includes more than one case, and the analysis is performed at two levels: within each case and across the cases (Stake 1995; Yin 2003).

**Comment [CT27]:** This describes the QUAL multiple case component of the study. Many MM studies employ case studies as the QUAL component of the overall design.



For this phase, we purposefully selected four participants, one from each group, from those who completed the survey. To provide the richness and the depth of the case description (Stake 1995; Creswell 1998), we used multiple sources for collecting the data: (1) in-depth semistructured telephone interviews with four participants; (2) researcher's reflection notes on each participant's persistence recorded immediately after the interview; (3) electronic follow-up interviews with each participant to secure additional information on the emerging themes; (4) academic transcripts and students' files to validate the information obtained during the interviews and to get additional details related to the cases; (5) elicitation materials, such as photos, objects, and other personal things, provided by each participant related to their respective persistence in the program; (6) participants' responses to the open-ended and multiple-choice questions on the survey in the first, quantitative phase; and (7) selected online classes taken by the participants and archived on the Lotus Notes server.

**Comment [CT28]:** There were only four participants chosen for the QUAL component of the study, but they were purposefully selected with great care.

**Comment [CT29]:** There were numerous data sources for the QUAL component of the study.

We audiotaped and transcribed verbatim each interview (Creswell 2005). We conducted a thematic analysis of the text data at two levels, within each case and across the cases, using QSR N6 qualitative software for data storage, coding, and theme development. The verification procedures included triangulating different sources of information, member checking, intercoder agreement, rich and thick descriptions of the cases, reviewing and resolving disconfirming evidence, and academic adviser's auditing (Lincoln and Guba, 1985; Miles and Huberman 1994; Stake 1995; Creswell 1998; Creswell and Miller 2002).

**Comment [CT30]:** Thematic analysis were conducted on the QUAL data.

**Comment [CT31]:** Several techniques were used to establish the trustworthiness of the QUAL analyses including member checks, triangulation, thick descriptions, and audits.

Four themes related to the participants' persistence in the ELHE program emerged in the analysis of each case and across cases: quality of academic experiences,

online learning environment, support and assistance, and student self-motivation. Despite being common for all participants, those themes differed in the number of and similarity of subthemes and categories comprising them. There were more similarities between the participants who were still in the program, although at different stages, than with those who graduated or withdrew from the program. The qualitative findings revealed that the quality of the program and the academic experiences of learning in the online environment, the importance of the student support infrastructure, and student goal commitment were integral components of those students' persistence in the ELHE program.

**Comment [CT32]:** Four themes emerged from the QUAL analysis.

Analysis of the number of sentences per each theme across the four cases, using the matrix feature of the QSR N6, showed the priority of the discussed themes for the participants. Thus, the quality of online learning experiences as related to the participants' persistence in the ELHE program was the most discussed theme. The participants were less inclined to talk about personal motivation but were more willing to focus on the advantages and/or disadvantages of the online learning environment and the supporting infrastructure, including institutional and external entities.

**Comment [CT33]:** QUAL data were quantized by counting the number of occurrences of each of the four themes. This allowed the investigators to discuss the "priority" of each theme for the participants.

#### PROCEDURAL ISSUES IN THE

#### MIXED-METHODS SEQUENTIAL EXPLANATORY DESIGN

As in any mixed-methods design, we had to deal with the issues of priority, implementation, and integration of the quantitative and qualitative approaches. Thus, we had to consider which approach, quantitative or qualitative (or both), had more emphasis

**Comment [CT34]:** This section discusses typical issues that face researchers using MM designs in their studies.

in our study design; establish the sequence of the quantitative and qualitative data collection and analysis; and decide where mixing or integration of the quantitative and qualitative approaches actually occurred in our study. We also had to find an efficient way to visually represent all the nuances of the study design for our own conceptual purposes and to provide its better comprehension by both the potential readers and reviewers. In solving those issues, our decision-making process was guided by the purpose of the study and its research questions, as well as by the methodological discussions in the literature (Morse 1991; Morgan 1998; Tashakkori and Teddlie 1998; Creswell et al. 2003).

### Priority

Priority refers to which approach, quantitative or qualitative (or both), a researcher gives more weight or attention throughout the data collection and analysis process in the study (Morgan 1998; Creswell 2003). Reportedly, it is a difficult issue to make a decision about (Creswell et al. 2003) and might depend on the interests of a researcher, the audience for the study, and/or what a researcher seeks to emphasize in this study (Creswell 2003). In the sequential explanatory design, priority, typically, is given to the quantitative approach because the quantitative data collection comes first in the sequence and often represents the major aspect of the mixed-methods data collection process. The smaller qualitative component follows in the second phase of the research. However, depending on the study goals, the scope of quantitative and qualitative research questions, and the particular design of each phase, a researcher may give the priority to the qualitative data collection and analysis (Morgan 1998), or both. Such decisions could

**Comment [CT35]:** This is a discussion of which approach (QUAL, QUAN, or both) should be given greater priority in a MM study.

**Comment [CT36]:** Several factors determine which component is given the higher priority in any given study.

be made either at the study design stage before the data collection begins or later during the data collection and analysis process.

In the illustrative study, from the very beginning, we decided to give priority to the qualitative data collection and analysis despite its being the second phase of the research process. Our decision was influenced by the purpose of the study to identify and explain the factors that affect students' persistence in the distance-learning doctoral program. The first, quantitative, phase of the study focused primarily on revealing the predictive power of ten selected external and internal factors on students' persistence. Although this phase was robust, the data collection was limited to one source, a cross-sectional survey, and the data analysis employed only two statistical techniques: descriptive statistics and discriminant function analysis.

**Comment [CT37]:** In this study, priority was given to the QUAL component.

The goal of the qualitative phase was to explore and interpret the statistical results obtained in the first, quantitative, phase. To enhance the depth of qualitative analysis, we decided to use a multiple case study design, which implied extensive and tedious data collection from different sources, as well as multiple levels of data analysis (Yin 2003). We performed a thematic analysis on two levels, individual cases and across cases, comparing the themes and categories and used a number of cross-case analysis techniques, including text units (sentences) counts for each theme across the four cases.

**Comment [CT38]:** The QUAL component used several sources of data and multiple types of analyses, while the QUAN component was limited to one data source and two statistical techniques.

## Implementation

Implementation refers to whether the quantitative and qualitative data collection and analysis come in sequence, one following another, or concurrently (Green et al. 1989; Morgan 1998; Creswell et al. 2003). In the sequential explanatory design, the data are

collected over the period of time in two consecutive phases. Thus, a researcher first collects and analyzes the quantitative data. Qualitative data are collected in the second phase of the study and are related to the outcomes from the first, quantitative, phase. The decision to follow the quantitative-qualitative data collection and analysis sequence in this design depends on the study purpose and the research questions seeking for the contextual field-based explanation of the statistical results (Green and Caracelli 1997; Creswell 1999).

In the illustrative study, we first collected the quantitative data using a Web-based survey. The goal of this phase was to identify the potential predictive power of selected variables on doctoral students' persistence and to allow for purposefully selecting informants for the second phase of the study. We then collected and analyzed the qualitative data to help explain why certain external and internal factors, tested in the first phase, were significant or not significant predictors of students' persistence in the program. Thus, the quantitative data and statistical results provided a general understanding of what internal and external factors contributed to students' persistence in the ELHE program. The qualitative data and its analysis secured the needed explanation as to why certain factors significantly or not significantly affected the participants' persistence.

**Comment [CT39]:** The QUAN/QUAL implementation sequence resulted first in a general understanding of the important factors involved in students' persistence, followed up by a detailed analysis of why certain factors were important.

### Integration

Integration refers to the stage or stages in the research process where the mixing or integration of the quantitative and qualitative methods occurs (Green, Caracelli, and Graham 1989; Tashakkori and Teddlie 1998; Creswell et al. 2003). The possibilities

**Comment [CT40]:** Integration is a very important part of MM research and refers to the mixing of the QUAN and QUAL methods.

range from mixing in the beginning stage of the study while formulating its purpose and introducing both quantitative and qualitative research questions (Teddlie and Tashakkori 2003) to the integration of the quantitative and qualitative findings at the interpretation stage of the study (Onwuegbuzie and Teddlie 2003). In addition, in the mixed-methods sequential designs, the quantitative and qualitative phases are connected (Hanson et al. 2005) in the intermediate stage when the results of the data analysis in the first phase of the study inform or guide the data collection in the second phase. In the sequential explanatory design, a researcher typically connects the two phases while selecting the participants for the qualitative follow-up analysis based on the quantitative results from the first phase (Creswell et al. 2003). Another connecting point might be the development of the qualitative data collection protocols, grounded in the results from the first, quantitative, phase, to investigate those results in more depth through collecting and analyzing the qualitative data in the second phase of the study.

**Comment [CT41]:** There are several points at which integration can occur in a MM study.

**Comment [CT42]:** This describes the general process whereby QUAL data collection protocols used in the second phase of a study are based on the results of a previous QUAN phase.

In the illustrative study, we connected the quantitative and qualitative phases during the intermediate stage in the research process while selecting the participants for the qualitative case studies from those who responded to the survey in the first, quantitative, phase based on their numeric scores. The second connecting point included developing the interview questions for the qualitative data collection based on the results of the discriminant function analysis in the first, quantitative, phase. We mixed the quantitative and qualitative approaches at the study design stage by introducing both quantitative and qualitative research questions and integrated the results from the quantitative and qualitative phases during the interpretation of the outcomes of the entire study.

**Comment [CT43]:** This paragraph describes where the points of integration for this illustrative study occurred.

*Case selection.* The options for case selection in the mixed-methods sequential explanatory design include exploring a few typical cases or following up with outlier or extreme cases (Morse 1991; Caracelli and Greene 1993; Creswell 2005). Although case selection was indicated as one of the connecting points in such design (Hanson et al. 2005), there are no established guidelines as to how researchers should proceed with selecting the cases for the follow-up qualitative analysis or the steps to follow. In the illustrative study, due to the explanatory nature of its second phase, we decided to focus on the typical case for each participant group. We developed the following systematic procedure to identify a typical respondent from four different groups.

**Comment [CT44]:** Researchers decided to select one typical case for each participant group. Typical case sampling is a purposive sampling technique.

Based on ten composite variable scores computed during the first, quantitative, phase, we first calculated the summed mean scores and their respective group means for all participants in each of the four groups. To limit the number of the participants eligible for consideration as prototypical representatives of their respective groups, we used the standard error of the mean to establish the lower and upper boundaries for the scores clustered around each group mean. Using the cross-tabulation procedure in SPSS, we identified a few participants from each group with the mean scores within one standard error of the mean (see Table 1).

**Comment [CT45]:** QUAN data analyses were used to create the sample of individuals from which the participants for the QUAL case study were selected.

**INSERT TABLE 1 ABOUT HERE.**

Then, within each of the four groups, we compared the participants on the following seven demographic variables used in the following sequence: number of credit hours completed, number of online courses taken, age, gender, residence, employment,

and family structure. Table 2 depicts a typical respondent for this ELHE participant sample.

**Comment [CT46]:** Profiles of typical respondents were derived based on seven QUAN demographic variables. This is an example of qualifying the data, in which numeric data are converted into a series of prototypes, in this case one prototype for each of the four groups. (See Table 2)

Using these criteria, we identified two participants from each group bearing the characteristics listed in Table 2. Finally, we used a maximal variation sampling strategy (Creswell 2005) to select one participant per group, which allowed us to preserve multiple perspectives based on both the status in the program and critical demographics. So, from eight participants, we selected one man and three women who displayed different dimensions on the following demographic characteristics: age, gender, residency, and family status (see Table 3). All four agreed to participate.

**Comment [CT47]:** Maximum variation sampling is another purposive sampling technique used in this study.

**INSERT TABLE 2 ABOUT HERE.**

**INSERT TABLE 3 ABOUT HERE.**

*Interview protocol development.* We then developed the interview protocol, the content of which was grounded in the quantitative results from the first phase. Because the goal of the second, qualitative, phase was to explore and elaborate on the results from the first, quantitative, phase of the study (Creswell et al. 2003), we wanted to understand why certain predictor variables contributed differently to the function discriminating four participant groups as related to their persistence in the ELHE program.

**Comment [CT48]:** As with many sequential studies, the results of the first phase is used to develop instruments or protocols used in the second phase.

Thus, five open-ended questions in the interview protocol explored the role of the five factors (online learning environment, ELHE program, faculty, services, and self motivation), which demonstrated statistically significant predictive power for this sample

**Comment [CT49]:** Open-ended items for the interview protocol were based on data derived from the QUAN component of the study.



of the ELHE students. Two other open-ended questions explored the role of the academic adviser and virtual learning community as related to students' persistence. Although those two factors did not significantly contribute to the function discriminating four participant groups in our study, their important role in students' persistence in traditional doctoral programs was reported in numerous studies (Bowen and Rudenstine 1992; Golde 2000; Brown 2001; Lovitts 2001). We pilot tested the interview protocol on one participant, purposefully selected from those who had completed the survey in the first, quantitative, phase of the study. Based on this pilot interview analysis, we slightly revised the order of the protocol questions and developed additional probing questions.

#### Integrating the Outcomes of Both Phases of the Study

We integrated the results of the quantitative and qualitative phases during the discussion of the outcomes of the entire study. As indicated at the beginning of the article, we asked both quantitative and qualitative research questions to better understand doctoral students' persistence in the ELHE program. In the Discussion section, we combined the results from both phases of the study to more fully answer those questions and develop a more robust and meaningful picture of the research problem. First, we interpreted the results that helped answer the study's major quantitative research question: "What factors (internal and external) predicted students' persistence in the ELHE program?" Then, we discussed the case study findings that were aimed at answering the guiding research question in the qualitative phase of the study: "How did the selected factors (internal and external) identified in phase I contribute to students' persistence in the ELHE program?" This process allowed for the findings from the

**Comment [CT50]:** QUAN and QUAL results were integrated in the discussion of the outcomes for the entire study.

second, qualitative, phase to further clarify and explain the statistical results from the first, quantitative, phase.

**Comment [CT51]:** The QUAL findings from the second phase of the study clarified and explained the QUAN statistical results from the first phase of the study.

We then discussed the study results in detail by grouping the findings to the corresponding quantitative and qualitative research subquestions related to each of the explored factors affecting students' persistence in the ELHE program. We augmented the discussion by citing related literature, reflecting both quantitative and qualitative published studies on the topic. Thus, combining the quantitative and qualitative findings helped explain the results of the statistical tests, which underscored the elaborating purpose for a mixed-methods sequential explanatory design (Green, Caracelli, and Graham 1989; Creswell et al. 2003).

## VISUAL MODEL

A multistage format of the mixed-methods research, which typically includes two or more stages, is difficult to comprehend without graphically representing the mixed-methods procedures used in the study. A graphical representation of the mixed-methods procedures helps a researcher visualize the sequence of the data collection, the priority of either method, and the connecting and mixing points of the two approaches within a study. It also helps a researcher understand where, how, and when to make adjustments and/or seek to augment information. In addition, it facilitates comprehending a mixed-methods study by interested readers, including prospective funding agencies.

**Comment [CT52]:** Graphical representations or visual models help (1) researchers to conduct their studies properly and (2) readers to understand multistage MM studies.

The value of providing a visual model of the procedures has long been expressed in the mixed-methods literature (Morse 1991; Tashakkori and Teddlie 1998; Creswell et al. 2003; Creswell 2005). Morse (1991) developed a notation system to document and explain the mixed-methods procedures and suggested a terminology that has become part of the typology for mixed methods designs. Other authors (Tashakkori and Teddlie 1998; Creswell et al. 2003; Hanson et al. 2005) provided some visual presentation of major mixed-methods designs. However, more detailed “how-to” guidelines are missing. Using Morse’s (1991) notation system and following the recommendations of Creswell (2005), Creswell et al. (2003), and Tashakkori and Teddlie (1998), we developed ten rules for drawing a visual model for the mixed-methods procedures with the intent of offering researchers some practical tools to present their often complicated mixed-methods designs. These rules include both the steps to follow while drawing the visual model and specific guidelines related to its content and format.

**Comment [CT53]:** Table 4 presents ten rules for drawing visual models for MM designs.

Using the ten rules presented in Table 4, we then created a graphical representation of the mixed-methods sequential explanatory design procedures used for the illustrative study (see Figure 1). The model portrays the sequence of the research activities in the study, indicates the priority of the qualitative phase by capitalizing the term QUALITATIVE, specifies all the data collection and analysis procedures, and lists the products or outcomes from each of the stages of the study. It also shows the connecting points between the quantitative and qualitative phases and the related products, as well as specifies the place in the research process where the integration or mixing of the results of both quantitative and qualitative phases occurs.

**Comment [CT54]:** Figure 1 presents a graphical model of the illustrative study discussed in this article.

**INSERT TABLE 4 ABOUT HERE.**

**INSERT FIGURE 1 ABOUT HERE.**

## CONCLUSION

In this article, we discussed some methodological issues researchers face while using the mixed-methods sequential explanatory study design. Those issues included decisions related to prioritizing the quantitative or qualitative approach (or both), implementing the data collection and analysis, connecting the quantitative and qualitative phases during the research process, and integrating the results of the two phases of the study. The use of the study of doctoral students' persistence in the distance-learning program in educational leadership helped illustrate how we addressed those procedural issues.

We showed that establishing the priority of the quantitative or qualitative approach within a sequential explanatory study depends on the particular design a researcher chooses for each phase of the study, the volume of the data collected during each phase, and the rigor and scope of the data analysis within each phase. In this mixed-methods design, the sequence of the quantitative and qualitative data collection is determined by the study purpose and research questions. A quantitative phase comes first in the sequence because the study goal is to seek an in-depth explanation of the results from the quantitative measures.

Mixing in the sequential explanatory design can take two forms: (1) connecting quantitative and qualitative phases of the study through selecting the participants for the second phase and developing qualitative data collection protocols grounded in the results of the statistical tests and (2) integrating quantitative and qualitative results while discussing the outcomes of the whole study and drawing implications. Such mixing of the quantitative and qualitative methods results in higher quality of inferences (Tashakkori and Teddlie 2003) and underscores the elaborating purpose of the mixed-methods sequential explanatory design. The complexity of the mixed-methods designs calls for a visual presentation of the study procedures to ensure better conceptual understanding of such designs by both researchers and intended audiences.

**Comment [CT55]:** These techniques were used for integrating the two components of the study.

**Comment [CT56]:** Inference quality is a phrase that has been proposed as a MM term to incorporate the QUAN concept of internal validity and the QUAL terms trustworthiness and credibility

The limitations of this methodological discussion rest on its reliance on one mixed-methods design, sequential explanatory. Other mixed-methods designs exist, and although the discussed methodological issues are also relevant to all those designs (Creswell et al. 2003), other decisions and considerations might guide researchers' choices. This article has highlighted only some of the issues facing a researcher who elects to use the mixed-methods sequential explanatory design. More methodological discussions are warranted on these and other mixed-methods procedural issues. Specifically, researchers might benefit from the discussions on prioritizing the quantitative and qualitative approaches within other sequential and concurrent mixed methods designs, ways of integrating quantitative and qualitative methods within a mixed-methods study, specific forms of mixed-methods data analysis, and establishing the validity of mixed-methods research. Providing researchers with some guidance on how to design, conceptualize, implement, and validate mixed-methods research will help

them conduct research with clean designs and more rigorous procedures and, ultimately, produce more meaningful study outcomes.

## REFERENCES

- Bean, J. P. 1980. Dropouts and turnover: The synthesis and test of a causal model of student attrition. *Research in Higher Education* 12:155-87.
- Bowen, W. G., and N. L. Rudenstine. 1992. *In pursuit of the PhD*. Princeton, NJ: Princeton University Press.
- Brown, R. E. 2001. The process of community-building in distance learning classes. *Journal of Asynchronous Learning Networks* 5 (2): 18-35.
- Caracelli, V. J., and J. C. Greene. 1993. Data analysis strategies for mixed methods evaluation designs. *Educational Evaluation and Policy Analysis* 15 (2): 195-207.
- Ceci, S. J. 1991. How much does schooling influence general intelligence and its cognitive components? A reassessment of the evidence. *Developmental Psychology* 27 (5): 703-22.
- Creswell, J. W. 1998. *Qualitative inquiry and research design: Choosing among five traditions*. Thousand Oaks, CA: Sage.

\_\_\_\_\_. 1999. Mixed methods research: Introduction and application. In *Handbook of educational policy*, ed. T. Cijek, 455-72. San Diego, CA: Academic Press.

\_\_\_\_\_. 2003. *Research design: Qualitative, quantitative, and mixed methods approaches*. 2nd ed. Thousand Oaks, CA: Sage.

\_\_\_\_\_. 2005. *Educational research: Planning, conducting, and evaluating quantitative and qualitative approaches to research*. 2nd ed. Upper Saddle River, NJ: Merrill/Pearson Education.

Creswell, J. W., L. F. Goodchild, and P. P. Turner. 1996. Integrated qualitative and quantitative research: Epistemology, history, and designs. In *Higher education: Handbook of theory and research*, ed. J. C. Smart, 90-136. New York: Agathon Press.

Creswell, J. W., and D. Miller. 2002. Determining validity in qualitative inquiry. *Theory into Practice* 39 (3): 124-30.

Creswell, J. W., V. L. Plano Clark, M. Gutmann, and W. Hanson. 2003. Advanced mixed methods research designs. In *Handbook on mixed methods in the behavioral and social sciences*, ed. A. Tashakkori and C. Teddlie, 209-40. Thousand Oaks, CA:

Sage.

Golde, C. M. 2000. Should I stay or should I go? Student descriptions of the doctoral attrition process. *Review of Higher Education* 23 (2): 199-227.

Green, J. C., and V. J. Caracelli, eds. 1997. Advances in mixed-method evaluation: The challenges and benefits of integrating diverse paradigms. In *New directions for evaluation*, ed. American Evaluation Association. San Francisco: Jossey-Bass.

Green, J. C., V. J. Caracelli, and W. F. Graham. 1989. Toward a conceptual framework for mixed-method evaluation designs. *Educational Evaluation and Policy Analysis* 11 (3): 255-74.

Hanson, W. E., J. W. Creswell, V. L. Plano Clark, K. P. Petska, and J. D. Creswell. 2005. Mixed methods research designs in counseling psychology. *Journal of Counseling Psychology* 52 (2): 224-35.

Ivankova, N. V. 2004. Students' persistence in the University of Nebraska-Lincoln distributed doctoral program in Educational Leadership in Higher Education: A mixed methods study. PhD diss., University of Nebraska-Lincoln.

Ivankova, N. V., and S. L. Stick. 2002. Students' persistence in the distributed doctoral program in educational administration: A mixed methods study. Paper presented at



the 13th International Conference on College Teaching and Learning,  
Jacksonville, FL.

Janz, N. K., M. A. Zimmerman, P. A. Wren, B. A. Israel, N. Freudenberg, and R. J. Carter. 1996. Evaluation of 37 AIDS prevention projects: Successful approaches and barriers to program effectiveness. *Health Education Quarterly* 23 (1): 80-97.

Kember, D. 1995. *Open learning courses for adults: A model of student progress*. Englewood Cliffs, NJ: Educational Technology Publications.

Kinnick, M. K., and K. Kempner. 1988. Beyond "front door" access: Attaining the bachelor's degree. *Research in Higher Education* 29 (4): 299-317.

Klassen, C., and B. Burnaby. 1993. "Those who know": Views on literacy among adult immigrants in Canada. *TESOL Quarterly* 27 (3): 377-97.

Lincoln, Y. S., and E. G. Guba. 1985. *Naturalistic inquiry*. Beverly Hills, CA: Sage.

Lovitts, B. E. 2001. *Leaving the ivory tower: The causes and consequences of departure from doctoral study*. New York: Rowman & Littlefield.

McMillan, J. H. 2000. *Educational research: Fundamentals for the consumer*. 3rd ed. New York: Addison Wesley Longman.

- Merriam, S. B. 1998. *Qualitative research and case study applications in education: Revised and expanded from case study research in education*. San Francisco: Jossey-Bass.
- Miles, M. B., and A. M. Huberman. 1994. *Qualitative data analysis: A sourcebook*. 2nd ed. Thousand Oaks, CA: Sage.
- Moghaddam, F. M., B. R. Walker, and R. Harre. 2003. Cultural distance, levels of abstraction, and the advantages of mixed methods. In *Handbook on mixed methods in the behavioral and social sciences*, ed. A. Tashakkori and C. Teddlie, 51-89. Thousand Oaks, CA: Sage.
- Morgan, D. 1998. Practical strategies for combining qualitative and quantitative methods: Applications to health research. *Qualitative Health Research* 8:362-76.
- Morse, J. M. 1991. Approaches to qualitative-quantitative methodological triangulation. *Nursing Research* 40:120-23.
- Onwuegbuzie, A. J., and C. Teddlie. 2003. A framework for analyzing data in mixed methods research. In *Handbook on mixed methods in the behavioral and social sciences*, ed. A. Tashakkori and C. Teddlie, 351-84. Thousand Oaks, CA: Sage.
- Rossmann, G. B., and B. L. Wilson. 1985. Number and words: Combining quantitative

and qualitative methods in a single large-scale evaluation study. *Evaluation Review* 9 (5): 627-43.

Stake, R. E. 1995. *The art of case study research*. Thousand Oaks, CA: Sage.

Stick, S., and N. Ivankova. 2004. Virtual learning: The success of a world-wide asynchronous program of distributed doctoral studies. *Online Journal of Distance Learning Administration* 7(4). Retrieved from <http://www.westga.edu/~distance/jmain11.html>.

Tashakkori, A., and C. Teddlie. 1998. Mixed methodology: Combining qualitative and quantitative approaches. *Applied Social Research Methods Series*, vol. 46. Thousand Oaks, CA: Sage.

\_\_\_\_\_, eds. 2003. *Handbook on mixed methods in the behavioral and social sciences*. Thousand Oaks, CA: Sage.

Teddlie, C., and A. Tashakkori. 2003. Major issues and controversies in the use of mixed methods in the social and behavioral sciences. In *Handbook on mixed methods in the behavioral and social sciences*, ed. A. Tashakkori and C. Teddlie, pp. 3-50. Thousand Oaks, CA: Sage.

Tinto, V. 1975. Dropout from higher education: A theoretical synthesis of recent

research. *Review of Educational Research* 45:89-125.

Yin, R. 2003. *Case study research: Design and methods*. 3rd ed. Thousand Oaks, CA: Sage.

NATALIYA V. IVANKOVA, Ph.D., is an assistant professor of educational psychology and research in the Department of Human Studies, School of Education, University of Alabama at Birmingham. Her research interests include procedural and application issues of mixed methods and qualitative research, computer-mediated learning, and student persistence in online learning environments. Her recent publications are “Designing a Mixed Methods Study in Primary Care” (*Annals of Family Medicine*, 2004), “Developing a Website in Primary Care” (*Family Medicine*, 2004), and “Preliminary Model of Doctoral Students’ Persistence in the Computer-Mediated Asynchronous Learning Environment” (*Journal of Research in Education*, in press).

JOHN W. CRESWELL, Ph.D., is the Clifton Institute Professor and a professor of educational psychology at the University of Nebraska-Lincoln. His research interests are mixed methods, qualitative research, and research design. He currently co-edits the new *Journal of Mixed Methods Research*. Recent book publications are *Educational Research: Planning, Conducting, and Evaluating Quantitative and Qualitative Research* (Merrill Education, 2005) and *Research Design: Qualitative, Quantitative, and Mixed Methods Research* (Sage, 2003).

SHELDON L. STICK, Ph.D., is a professor in the Department of Educational Administration, College of Education and Human Sciences, University of Nebraska-Lincoln. His research interests include technology and distance learning, comparative history of higher education, research on policy and administrative issues in higher education using qualitative and mixed-methods approaches, and academic and institutional leadership. Recent publications are “The History of Post-secondary Finance in Alberta—An Analysis” (Canadian Journal of Educational Administration and Policy, 2005), “Marketing Activities in Higher Education Patenting and Technology Transfer” (Comparative Technology Transfer and Society, in press), and “Characteristics, Roles, and Responsibilities of the Designated Institutional Official (DIO) Position in Graduate Medical Education” (Academic Medicine, in press).

TABLE 1

Participants per Group with Mean Scores within One Standard Error of the Mean

---

| Group              | Participants | Group Mean | Standard Error of the Mean |
|--------------------|--------------|------------|----------------------------|
| Beginning          | 11           | 3.13       | 0.05                       |
| Matriculated       | 6            | 3.20       | 0.04                       |
| Graduated          | 8            | 3.45       | 0.06                       |
| Withdrawn/inactive | 5            | 2.91       | 0.09                       |

---

TABLE 2

Typical Educational Leadership in Higher Education Respondent

---

|                        | Group 1:<br>Beginning | Group 2:<br>Matriculated | Group 3:<br>Graduated | Group 4:<br>Withdrawn/Inactive |
|------------------------|-----------------------|--------------------------|-----------------------|--------------------------------|
| Credit hours completed | 10-30                 | >45                      | NA                    | 3-9                            |
| Online courses taken   | >5                    | >6                       | >6                    | 1-2                            |
| Age (years)            | 36-54                 | 36-54                    | 46-54                 | >46                            |
| Gender                 | Female                | Female                   | Male                  | Female                         |
| Nebraska residency     | Out of state          | Out of state             | Out of state          | Out of state                   |
| Employment             | Full-time             | Full-time                | Full-time             | Full-time                      |

---

TABLE 3

Participants Selected for Case Study Analysis Using the Maximal Variation Principle

|               | Group 1:            | Group 2:                                     | Group 3:                                       | Group 4:                      |
|---------------|---------------------|----------------------------------------------|------------------------------------------------|-------------------------------|
|               | Beginning<br>(Gwen) | Matriculated<br>(Lorie)                      | Graduated<br>(Larry)                           | Withdrawn/Inactive<br>(Susan) |
| Age (years)   | 36-54               | 36-45                                        | 46-54                                          | >55                           |
| Gender        | Female              | Female                                       | Male                                           | Female                        |
| Residency     | In state            | Out of state                                 | Out of state                                   | Out of state                  |
| Family status | Single              | Married with<br>children<br>older<br>than 18 | Married with<br>children<br>younger<br>than 18 | Single                        |



TABLE 4

Ten Rules for Drawing Visual Models for Mixed-Methods Designs

---

Give a title to the visual model.

Choose either horizontal or vertical layout for the model.

Draw boxes for quantitative and qualitative stages of data collection, data analysis, and interpretation of the study results.

Use capitalized or lowercase letters to designate priority of quantitative and qualitative data collection and analysis.

Use single-headed arrows to show the flow of procedures in the design.

Specify procedures for each quantitative and qualitative data collection and analysis stage.

Specify expected products or outcomes of each quantitative and qualitative data collection and analysis procedure.

Use concise language for describing procedures and products. Make your model simple.

Size your model to a one-page limit.

---

**FIGURE 1**  
**Visual Model for Mixed-Methods**  
**Sequential Explanatory Design Procedures**

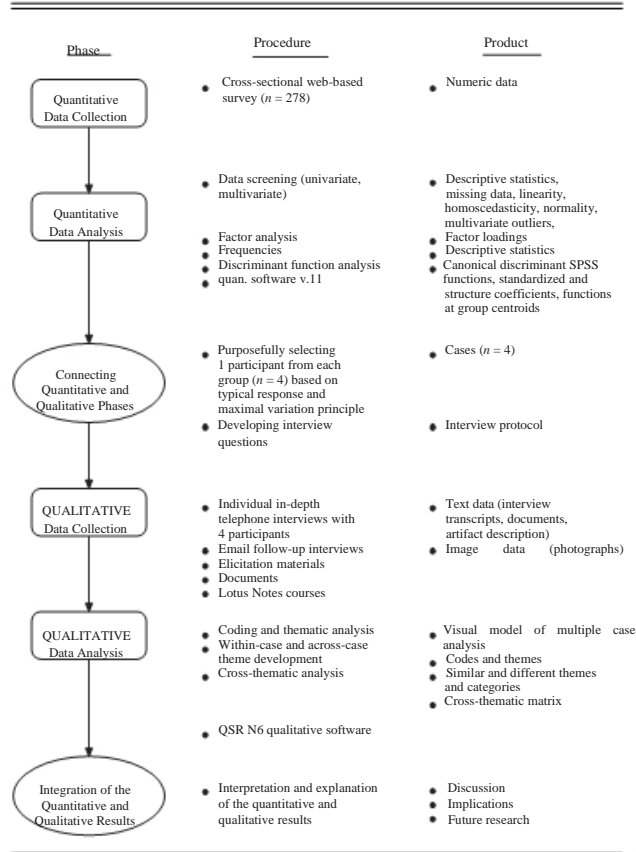

Supplement: Supplementary file 1 [file Appendix%20A.Ivankova,%20et%20al.2006.pdf]
